# Supplementary material for: Multi-DNA–Ag nanoclusters: reassembly mechanism and sensing the change of HIF in cells
Source: Royal Society of Chemistry journal article supplement (doi:10.1039/c3tb20623h), 2013-01-01
Supplement: c3tb20623h.pdf [file c3tb20623h.pdf]

Supporting

## A multi-DNA-Ag Nanocluster: Reassembly Mechanism and Sense the Change of HIF-1 in Cells

Ting-Ting Zhao<sup>a,b</sup>, Qiu-Yun Chen<sup>a,b\*</sup>, Cheng Zeng<sup>a</sup>, Ya-Quan Lan<sup>a</sup>, Jin-Guo Cai<sup>a</sup>, Jia Liu<sup>c</sup>, Jing Gao<sup>c</sup>

<sup>a</sup>School of chemistry and chemical engineering, Jiangsu University, Zhenjiang, 212013, P.R.China

<sup>b</sup> State key Laboratory of Coordination Chemistry, Nanjing University, 210093, P.R.China.

<sup>c</sup>School of Pharmacy, Jiangsu University, Zhenjiang, 212013, P. R. China

\*Corresponding author: *E-mail address*: [chenqy@ujs.edu.cn](mailto:chenqy@ujs.edu.cn) (Q.Y. Chen)

**Table S1** Sequence of DNA

| Name         | Sequence 5' — 3'      |
|--------------|-----------------------|
| Template-DNA | CCTCCTTCCTCCCTACGTGCT |
| Target-DNA   | AGCACGTAG             |

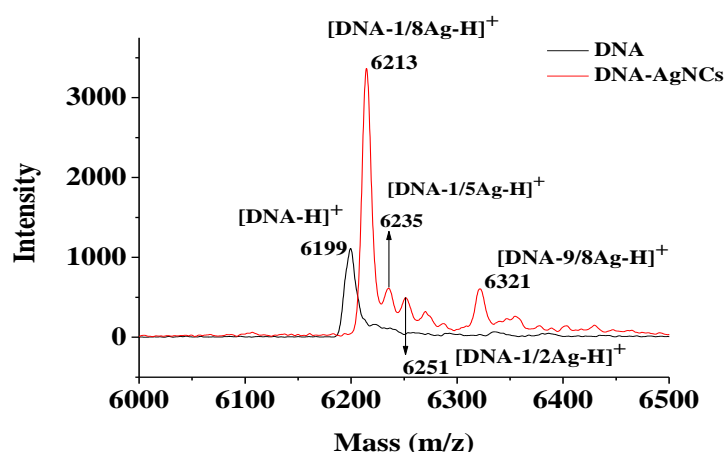

**Fig. S1.** ESI-MS spectra of DNA and DNA-AgNCs. The spectrometer was operated in a positive-ion mode. The structure of DNA-AgNCs was determined by ESI-MS measurement. The positive-mode ESI-MS spectra revealed one major peak for positively charged DNA, corresponding to  $m/z$  6199. The most dominant peak of the DNA-AgNCs occurred at  $m/z$  6213, assigned to the  $[\text{DNA-1/8Ag-H}]^+$  anion, suggesting the presence of eight DNA strands at per Ag atom in this system. However, there are also several minor peaks at 6235, 6251, 6321, assigned to the  $[\text{DNA-1/5Ag-H}]^+$ ,  $[\text{DNA-1/2Ag-H}]^+$  and  $[\text{DNA-9/8Ag-H}]^+$ , respectively.

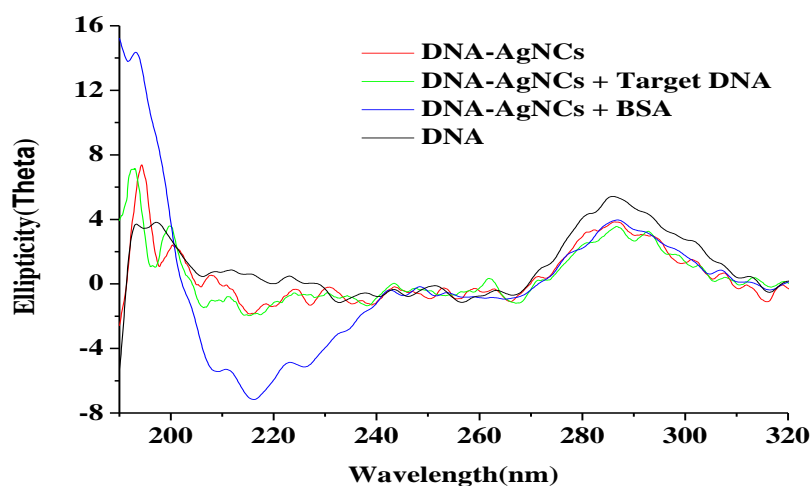

**Fig. S2.** CD spectra of DNA-Ag nanoclusters in 0.5 mM Citrate Buffer (pH 5.0): (black line) no Ag; (red line) DNA-AgNCs; (green line) DNA-AgNCs + Target-DNA; (blue line) DNA-AgNCs + BSA. Circular dichroism (CD) is a powerful technique for the study of DNA conformational changes.<sup>1</sup> As shown in the Fig.S2, the CD spectra of DNA have features at about 280 nm (+ve ellipticity) and 245 nm (-ve ellipticity), which are specific spectra features for B-Form DNA. The formation of DNA-AgNCs makes the negative band change to around 210 nm, which is the characteristic band for A-Form DNA. It reveals that DNA changes from B-Form to A-Form after the Ag NCs formed. DNA strands rich in cytosine also generate quadruplexes.<sup>1,2,3</sup> The cytosine quadruplexes provide a characteristic CD spectrum with a dominant positive band at 290 nm.<sup>4,5</sup> This is why there is a dominant peak at 285 nm in the CD Spectra. The ellipticity of the DNA-AgNCs at 285 nm was less than that of free DNA, revealing the DNA formed a folded structure that protected the AgNCs.<sup>6</sup> Our CD results confirm that the characteristic bands of DNA- AgNCs at 215 nm and 285 nm remain essentially unchanged when target-DNA are present in the solution, suggesting that the secondary structure of DNA is negligibly modified in the DNA-target DNA complex.

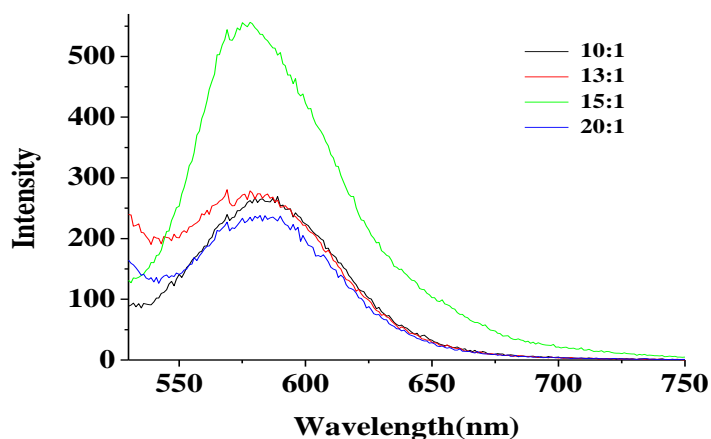

**Fig. S3.** The fluorescence emission spectra of DNA-AgNCs with different ratio of  $\text{Ag}^+$  and DNA, when the ratio of DNA and  $\text{Ag}^+$  is 1:15, a maximum fluorescent emission was shown.

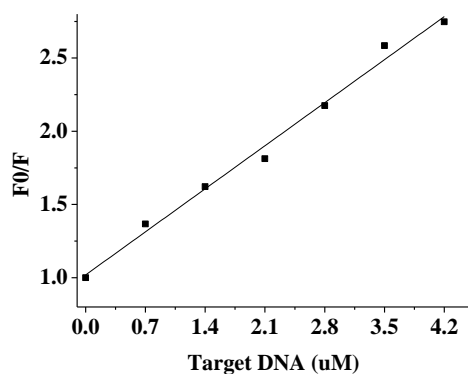

**Fig. S4.** Relationship of relative fluorescence intensity ( $F_0/F$ ) with varying target-DNA concentration. A linear equation between the value of  $F_0/F$  and the concentrations is  $F_0/F = 0.41997C_{T-DNA} + 1.01902$ .

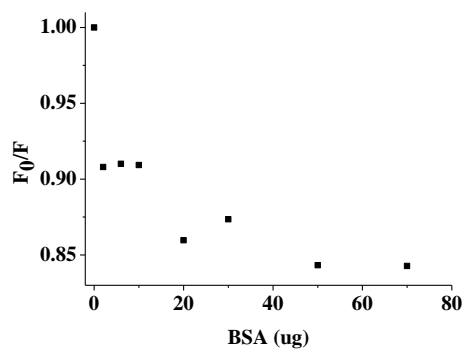

**Fig. S5.** Relationship of relative fluorescence intensity ( $F_0/F$ ) with varying BSA quantity. The value of  $F_0/F$  changed irregularly as the addition of BSA.

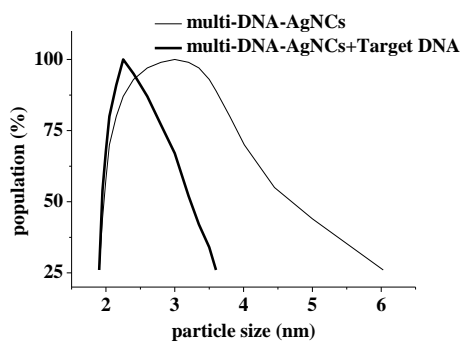

**Fig. S6.** Size distribution of silver nanoparticles in water.

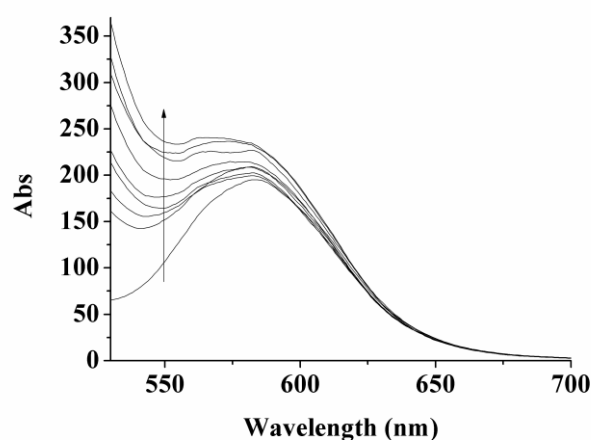

Fig. S7A. Emission spectra of fluorescence multi-DNA-AgNCs in the presence of ct-DNA (the concentration of ct-DNA from top: 0, 0.7, 2.0, 3.3, 6.7, 10, 16.7, 23.3, 36.7  $\mu\text{g/mL}$ ).

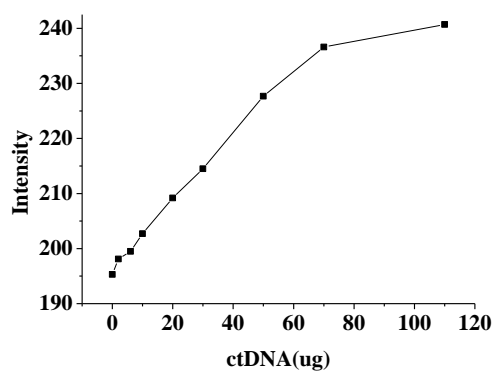

Fig. S7B. The relationship of relative fluorescence intensity (585 nm) of multi-DNA-AgNCs with varying ct-DNA quantity.

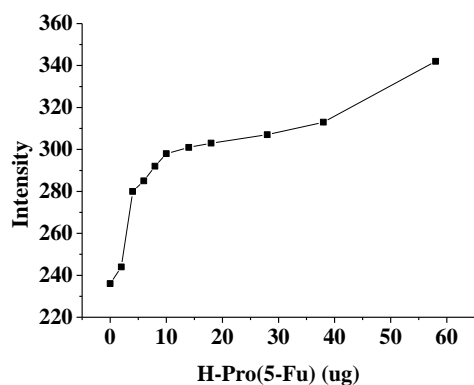

Fig. S8. The relationship of relative fluorescence intensity (585 nm) of multi-DNA-AgNCs with varying quantity of total protein from HepG-2 incubated with 5-Fu.

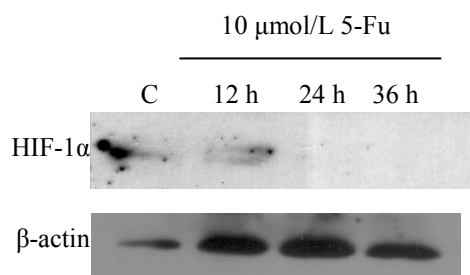

**Fig. S9.** The gel electrophores data of total protein from HepG-2 incubated with 5-Fu for 12, 24, 36h. The result showed that 5-Fu decreased the amount of HIF-1 in HepG-2 cells.

## Reference:

- 1 J. Kypr, I. Kejnovská, D. Renciuk, M. Vorlicková, *Nucleic Acids Res.*, 2009, **37**, 1713–1725.
- 2 J. L. Mergny, L. Lacroix, X. G. Han, J. L. Leroy, C. Helene, *J. Am. Chem. Soc.*, 1995, **117**, 8887–8898.
- 3 M. Gueron, J. L. Leroy, *Curr. Opin. Struct. Biol.*, 2000, **10**, 326–33.
- 4 G. Manzini, N. Yathindra, L. E. Xodo, *Nucleic Acids Res.*, 1994, **22**, 4634–4640.
- 5 T. Simonsson, M. Pribylova, M. Vorlickova, *Biochem. Biophys. Res. Commun.*, 2000, **278**, 158–166.
- 6 G. Y. Lan, W. Y. Chen, H. T. Chang, *Biosen. Bioelec.*, 2011, **26**, 2431–2435.
